# Supplementary material for: Gastrodin Protects Apoptotic Dopaminergic Neurons in a Toxin-Induced Parkinson’s Disease Model
Source: Hindawi journal article supplement (doi:10.1155/2013/514095), 2013-01-01
Supplement: f1 [file 514095.f1.pdf]

Supplementary Table 1. Primers used in this study

| Gene      |  | Primer                |                       |
|-----------|--|-----------------------|-----------------------|
| Symbol    |  | Forward               | Reverse               |
| Bax (m)   |  | CACCAAGGTGCCGGAAGTGA  | AATGCCCATGTCCCCCAATC  |
| Bcl-2 (m) |  | ACGACTTCTCCCGCCGCTAC  | CCCAGCCTCCGTTATCCTGG  |
| GAPDH (m) |  | GCAGTGGCAAAGTGGAGATTG | TGCAGGATGCATTGCTGACA  |
| Bax (h)   |  | CTGGACAGTAACATGGAGC   | TCTTCTTCCAGATGGTGAGT  |
| Bcl-2 (h) |  | ACTTTGCAGAGATGTCCAGT  | CGGTTCAGGTACTCAGTCAT  |
| GAPDH (h) |  | GCAGTGGCAAAGTGGAGATTG | TGCAGGATGCATTGCTGACA  |
| HO-1 (m)  |  | TCCAGACACCGCTCCTCCAG  | GGATTTGGGGCTGCTGCTTTC |

Supplementary Figure 1

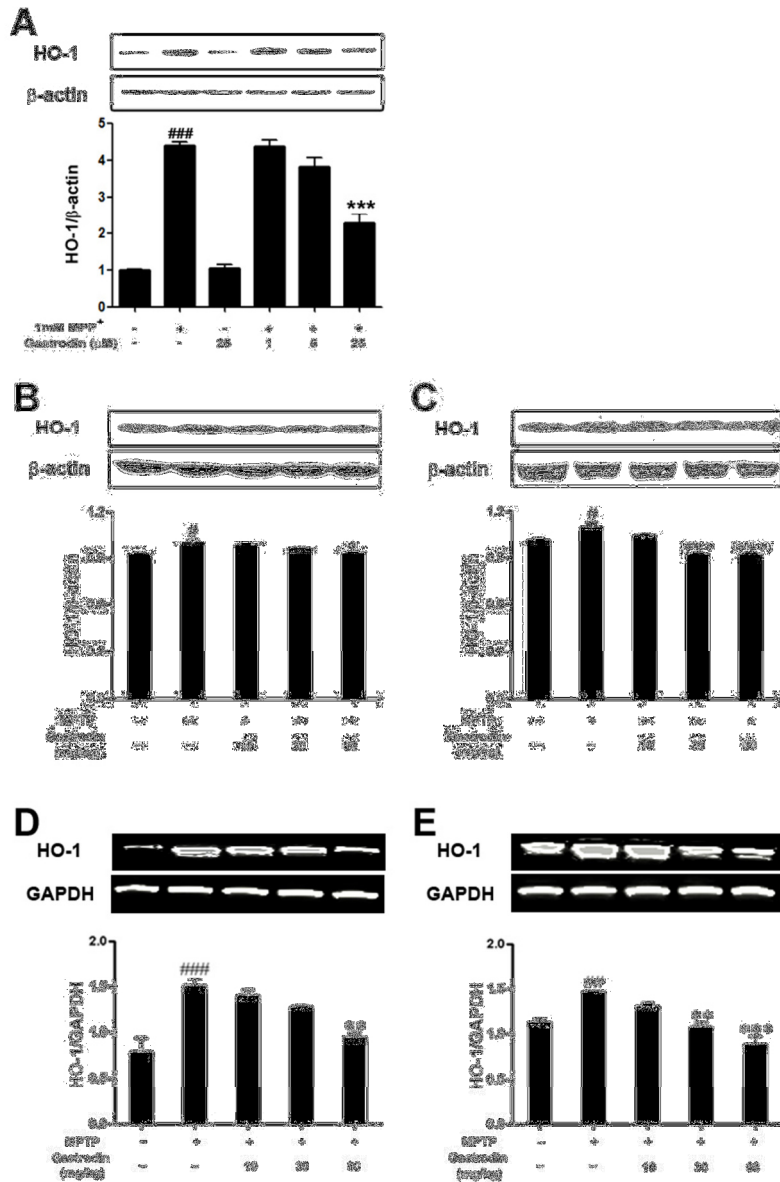

**Supplementary Figure 1:** Gastrodin prevents MPP<sup>+</sup> and MPTP induced HO-1 expression in SH-SY5Y cells (A), the substantia nigra pars compacta (SNpC) (B), and striatum (C) respectively. HO-1 protein levels were assessed by Western blot analysis in cells/animal tissues. Bar graphs show quantitative data for HO-1 signals that are normalized to the  $\beta$ -actin signal (n = 3–4 per group). Semiquantitative PCR was done in SNpC and striatum area of mice after MPTP treatment. Expression of HO-1 mRNA in

SNpC (D) and striatum (E) Values are mean  $\pm$  standard error (### $p < 0.01$  vs. vehicle group) and (\*\*\*) $p < 0.001$  and vs. MPP<sup>+</sup>/MPTP group)
